# Supplementary material
Source: ML conference proceedings conference paper supplement (https://openreview.net/forum?id=0QpwcDPiHT)
Supplement: supplementary_material [file attachment]

---

# Language Models Implement Simple Word2Vec-style Vector Arithmetic

---

Anonymous Author(s)

Affiliation

Address

email

## Abstract

1 A primary criticism towards language models (LMs) is their inscrutability. This  
2 paper presents evidence that, despite their size and complexity, LMs sometimes  
3 exploit a computational mechanism familiar from traditional word embeddings:  
4 the use of simple vector arithmetic in order to encode abstract relations (e.g.,  
5 *Poland:Warsaw::China:Beijing*). We investigate a range of language model sizes  
6 (from 124M parameters to 176B parameters) in an in-context learning setting, and  
7 find that for a variety of tasks (involving capital cities, upper-casing, and past-  
8 tensing), a key part of the mechanism reduces to a simple linear update applied  
9 by the feedforward networks. We further show that this mechanism is specific  
10 to tasks that require retrieval from pretraining memory, rather than retrieval from  
11 local context. Our results contribute to a growing body of work on the mechanistic  
12 interpretability of LLMs, and offer reason to be optimistic that, despite the massive  
13 and non-linear nature of the models, the strategies they ultimately use to solve tasks  
14 can sometimes reduce to familiar and even intuitive algorithms.

## 15 1 Intro

16 The growing capabilities of large language models (LLMs) have led to an equally growing interest in  
17 understanding how such models work under the hood. Such understanding is critical for ensuring that  
18 LLMs are reliable and trustworthy once deployed. Recent work (often now referred to as “mechanistic  
19 interpretability”) has contributed to this understanding by reverse-engineering the data structures and  
20 algorithms that are implicitly encoded in the model’s weights, e.g., by identifying detailed circuits  
21 [Wang et al., 2022, Elhage et al., 2021, Olsson et al., 2022] or by identifying mechanisms for factual  
22 storage and retrieval which support intervention and editing [Geva et al., 2021b, Li et al., 2022, Meng  
23 et al., 2022a,c, Dai et al., 2022].

24 Here, we contribute to this growing body of work by analyzing how LLMs recall information during  
25 in-context learning. Specifically, we observe that the mechanism that LLMs use in order to retrieve  
26 certain facts (e.g., mapping a country to its capital city) bears a striking resemblance to the type of  
27 vector arithmetic operations associated with LLMs’ simpler, static word-embedding predecessors.  
28 That is, early word embeddings such as word2vec [Mikolov et al., 2013] famously supported factual  
29 recall via linear vector arithmetic—e.g., there existed some vector that, when added to the vector  
30 for any country would produce the vector for its capital. Modern LLMs are based on a complex  
31 transformer architecture [Vaswani et al., 2017] which produces contextualized word embeddings  
32 [Peters et al., 2018, Devlin et al., 2019] connected via multiple non-linearities. Despite this, we find  
33 that LLMs implement a very similar vector-addition mechanism which plays an important role in a  
34 number of in-context-learning tasks.

35 We study this phenomenon in three tasks—involving recalling capital cities, uppercasing tokens, and  
36 past-tensing verbs. Our key findings are:

- We find evidence of a **distinct processing signature** in the forward pass which characterizes this mechanism. That is, if models need to perform the `get_capital(x)` function, which takes an argument  $x$  and yields an answer  $y$ , they must first surface the argument  $x$  in earlier layers which enables them to apply the function and yield  $y$  as the final output (Figure 2). This signature generalizes across models and tasks, but appears to become sharper as models increase in size.
- We take a closer look at GPT2-Medium, and find that the vector arithmetic mechanism is implemented by mid-to-late layer feedforward networks (FFNs) in a way that is **modular and supports intervention**. That is, FFNs construct a vector that is not specific to context or argument, such that the same vector which produces *Warsaw* given *Poland* in one context can be dropped into an unrelated context to produce *Beijing* given *China*.
- We demonstrate that this mechanism is **specific to recalling information from pretraining memory**. For settings in which the correct answer can be retrieved from the prompt, this mechanism does not appear to play any role, and FFNs can be ablated entirely with relatively minimal performance degradation. Thus, we present new evidence supporting the claim that FFNs and attention specialize for different roles, with FFNs supporting factual recall and attention copying and pasting from local context.

Taken together, our results offer new insights about one component of the complex algorithms that underlie in-context learning. The simplicity of the mechanism, in itself surprising, raises the possibility that other apparently complicated behaviors may be supported by a sequence of simple operations under the hood. Moreover, our results suggest a distinct processing signature and hint at a method for intervention. These ideas could support future work on detecting and preventing unwanted behavior by LLMs at runtime.

## 2 Methods

In decoder-only transformer language models [Vaswani et al., 2017], a sentence is processed one word at a time, from left to right. The token at the current timestep is passed into the input of the model in order to predict the next, and so on. In this paper, we focus on the transformations that the next-token prediction undergoes in order to predict the next word. At each layer, an attention module and feed-forward network (FFN) module apply subsequent updates to this representation. Consider the FFN update at layer  $i$ , where  $x_i$  is the current next-token representation. The update applied by the FFN here is calculated as  $\text{FFN}(x_i) = \vec{o}_i$ ,  $x_{i+1} = x_i + \vec{o}_i$  where  $x_{i+1}$  is the updated token for the next layer. Note that due to the *residual connection*, the output vector  $\vec{o}_i$  is added to the input.  $\vec{x}$  is updated this way by the attention and FFNs until the end of the model, where the token is decoded into the vocab space with the language modeling head  $E$ :  $\text{softmax}(E\vec{x})$ . From start to end,  $x$  is only updated by additive updates, and because of this, is said to form a *residual stream* [Elhage et al., 2021]. Thus, the token representation  $x_i$  represents all of the additions made into the residual stream up to layer  $i$ .

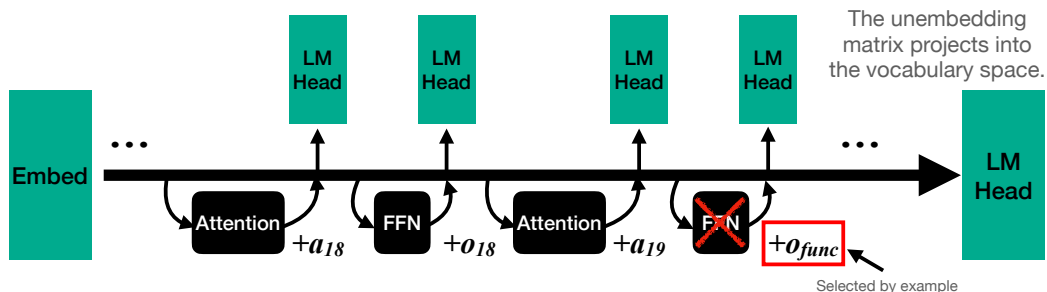

Figure 1: When decoding the next word, additive updates are made through the residual connections of each attention/FFN sub-layer. To decode the running prediction at every layer, the pre-trained language modeling head is applied at various points in each layer as in Geva et al. [2022a], nostalgebraist [2020]. The  $\vec{o}$  vector interventions we make (§4.1) are illustrated by removing one or more FFN sub-layers, and replacing their updates with pre-defined vectors extracted from other examples.

## 74 2.1 Early Decoding

75 A key insight from the residual stream perspective is that we can decode the next token prediction  
76 with the LM head before it reaches the final layer. This effectively allows for “print statements”  
77 throughout the model’s processing. The intuition behind this technique is that LMs incrementally  
78 update the token representation  $\vec{x}$  to build and refine an encoding of the vocabulary distribution.  
79 This technique was initially introduced in [nostalgebraist \[2020\]](#) as the logit lens, and [Geva et al.  
80 \[2022b\]](#) show that LMs do in fact refine the output distribution over the course of the model. Figure 1  
81 illustrates the process we use to decode hidden states into the vocabulary space, in which the hidden  
82 state at each layer is decoded with the pre-trained language modeling head  $E$ . After decoding into  
83 the vocabulary space, we apply a softmax to get a probability distribution over all tokens. When we  
84 decode at some layer, we say that the most likely token in the resulting vocab distribution is currently  
85 being represented in the residual stream. We examine several in-context learning tasks to understand  
86 how the answers to these problems are discovered by a model over the course of the forward pass.

## 87 2.2 Tasks

88 Can we understand the subprocesses underlying how LMs solve simple problems? We apply early  
89 decoding to suite of in-context learning tasks to explore the transformations the next token prediction  
90 undergoes in order to predict the answer.

91 **World Capitals** Our World Capitals task requires the model to retrieve the capital city for various  
92 states and countries in a few-shot setting. The dataset we use contains 248 countries and territories.  
93 A one-shot example is shown below:

```
“Q: What is the capital of France?  
A: Paris  
Q: What is the capital of Poland?  
A: ___” Expected Answer: “ Warsaw”
```

95 **Reasoning about Colored Objects** We focus on a subset of 200 of the reasoning about  
96 colored objects dataset prompts (henceforth, the colored objects dataset) from BIG-Bench  
97 [\[Srivastava et al., 2022\]](#), which gives the model a list of colored common objects and require  
98 to simply state the color of a query object. For the purposes of this paper, we focus only  
99 on one aspect of this task—the model’s ability to output the final answer in the correct format.<sup>1</sup>

```
“Q: On the floor, I see a silver keychain, a red pair of sunglasses, a gold sheet of paper, a black dog  
leash, and a blue cat toy. What color is the keychain?  
A: Silver  
Q: On the table, you see a brown sheet of paper, a red fidget spinner, a blue pair of sunglasses, a teal  
dog leash, and a gold cup. What color is the sheet of paper?  
A: ___” Expected answer: “ Brown”
```

101 **Past Tense Verb Mapping** Lastly, we examine whether a language model can accurately recognize  
102 a pattern and predict the past tense form of a verb given its present tense. The dataset used is the  
103 combination of the regular and irregular partitions of the past tense linguistic mapping task in  
104 BIG-Bench [\[Srivastava et al., 2022\]](#). After filtering verbs in which the present and past tense forms  
105 start with the same token, we have a total of 1,567 verbs. An example one-shot example is given below:

```
“Today I abandon. Yesterday I abandoned. Today I abolish. Yesterday I ___” Expected answer: “  
abolished”
```

## 107 2.3 Models

108 We experiment exclusively on decoder-only transformer LMs across various sizes and pre-training  
109 corpora. When not specified, results in figures are from GPT2-medium. We also include results  
110 portraying the stages of processing signatures in the residual streams of the small, large, and extra  
111 large variants [\[Radford et al.\]](#), the 6B parameter GPT-J model [\[Wang and Komatsuzaki, 2021\]](#), and  
112 the 176B BLOOM model [\[Scao et al., 2022\]](#), either in the main paper or in the Appendix.

<sup>1</sup>The reason for this is that most of the results in this paper were originally observed as incidental findings while studying the Reasoning about Colored Objects task more generally. We thus zoom in on this one component for the purposes of the mechanism studied here, acknowledging that the full task involves many other steps that will no doubt involve other types of mechanisms.

### 113 3 Stages of Processing in Predicting the Next Token

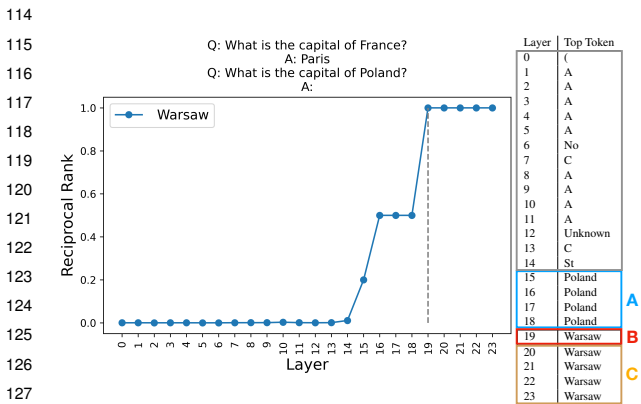

114  
115  
116  
117  
118  
119  
120  
121  
122  
123  
124  
125  
126  
127  
128  
129 Figure 2: We can decode the running next-token prediction in an in-context learning task to reveal functionally distinct stages of processing. The blue box (A) shows where the model prepares an argument for transformation, the red box (B) shows the function application phase during which the argument is transformed (here with the `capital_of` function), and the yellow box (C) shows a saturation event, in which the model has found the answer, and stops updating the prediction.

130  
131  
132  
133  
134  
135  
136  
137  
138  
139 the question inquires about (e.g., the  $x$ , in `get_capital(x)`). During **Function Application** we find that the model abruptly switches from the argument to the output of the function (the  $y$ , in `get_capital(x) = y`). We find that function application is typically applied by the FFN update at that layer to the residual stream. This is done by adding the output vector  $\vec{o}$  of the FFN to the residual stream representation, thus transforming it with an additive update. We study these  $\vec{o}$  vectors in detail in Section 4. Finally, the model enters **Saturation**<sup>2</sup>, where the model recognizes it has solved the next token, and ceases updating the token representation for the remaining layers.

140  
141  
142  
143  
144  
145  
146  
147  
148  
149  
150  
151 The trend can be characterized by an X-shaped pattern of the argument and final output tokens when plotting the ranks of the argument( $x$ ) and output ( $y$ ) tokens. We refer to this behavior as argument-function processing. Figure 3 shows that this same processing signature can be observed consistently across tasks and models. Moreover, it appears to become more prominent as the models increase in size. Interestingly, despite large differences in number of layers and overall size, models tend to undergo this process at similar points proportionally in the model.

### 152 4 Implementation of Context-Independent Functions in FFN Updates

153  
154  
155  
156  
157 The above results on processing signature suggest that the models “apply” a function about 2/3rds of the way through the network with the addition of an FFN update. Here, we investigate the mechanism via which that function is applied more closely. Specifically, focusing on GPT2-Medium<sup>3</sup>, we show that we can force the encoded function to be applied to new arguments in new contexts by isolating the responsible FFN output vector and then dropping into a forward pass on a new input.

First, we use the early decoding method in order to investigate how the processing proceeds over the course of a forward pass to the model. Each task requires the model to infer some relation to recall some fact, e.g., retrieving the capital of Poland. In these experiments, we see several discrete stages of processing that the next token undergoes before reaching the final answer. These states together provide evidence that the models “apply” the relevant functions (e.g., `get_capital`) abruptly at some mid-late layer to retrieve the answer. Moreover, in these cases, the model prepares the argument to this function in the layers prior to that in which the function is applied.

In Figure 2 we illustrate an example of the stages we observe across models. For the first several layers, we see no movement on the words of interest. Then, during **Argument Formation**, the model first represents the argument to the desired relation in the residual stream. This means that the top token in the vocabulary distribution at some intermediate layer(s) is the subject

<sup>2</sup>Saturation events are described in Geva et al. [2022a] where detection of such events is used to “early-exit” out of the forward pass

<sup>3</sup>We focus on one model because manual analysis was required in order to determine how to perform the intervention. See Appendix for results on GPT-J and Section 7 for discussion.

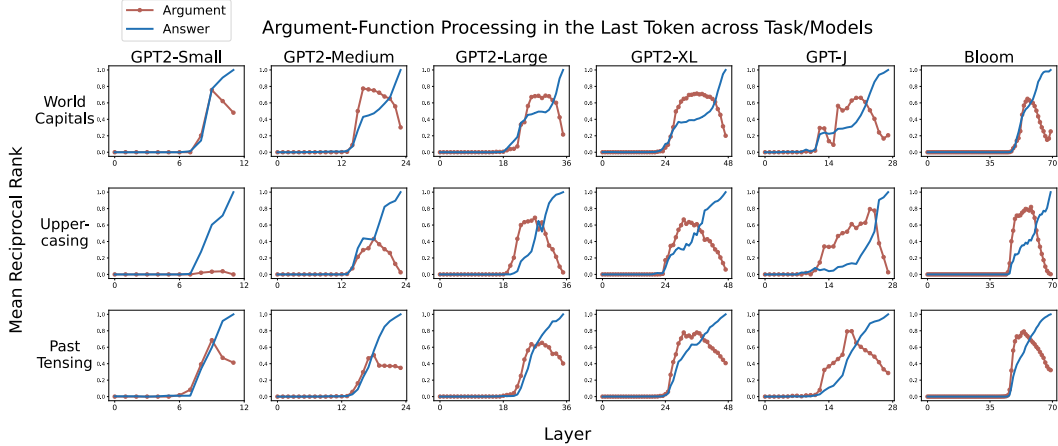

Figure 3: Argument formation and function application is characterized by a promotion of the argument (red) followed by it being replaced with the answer token (blue), forming an X when plotting reciprocal ranks. Across the three tasks we evaluate, we see that most of the models exhibit these traces, and despite the major differences in model depths, the stages occur at similar points in the models. Data shown is filtered by examples in which the models got the correct answer.

#### 158 4.1 $\vec{o}$ Vector Interventions

159 Consider the example in Figure 2. At layer 18, the residual stream ( $x_{18}^{\vec{r}}$ ) is in  
 160 argument formation, and represents the “Poland” token. At the end of layer  
 161 19, a function is applied, transforming  $x_{19}^{\vec{r}}$  into the answer token “Warsaw.”

162 As discussed in the previous section, we can isolate the function application in this case to  
 163 FFN 19; let  $x_{19}^{\vec{r}}$  represent the residual stream after the attention update, but before the FFN  
 164 update at layer 19 (which still represents Poland). Recall that the update made by FFN 19 is writ-  
 165 ten  $\text{FFN}_{19}(x_{19}^{\vec{r}}) = o_{19}^{\vec{r}}$  and  $x_{19}^{\vec{r}} = x_{19}^{\vec{r}} + o_{19}^{\vec{r}}$ . We find that  $o_{19}^{\vec{r}}$  will apply the `get_capital`  
 166 function regardless of the content of  $x_{19}^{\vec{r}}$ . For example, if we add  $o_{19}^{\vec{r}}$  to some  $\tilde{x}$  which rep-  
 167 resents the “China” token, it will transform into “Beijing”. Thus we refer to  $o_{19}^{\vec{r}}$  as  $o_{city}^{\vec{r}}$  since  
 168 it retrieves the capital cities of locations stored in the residual stream. We locate such  $\vec{o}$  vectors  
 169 in the uppercasing and past tense mapping tasks in the examples given in Section 2.2, which we  
 170 refer to as  $o_{upper}^{\vec{r}}$  and  $o_{past}^{\vec{r}}$ , respectively.<sup>4</sup>

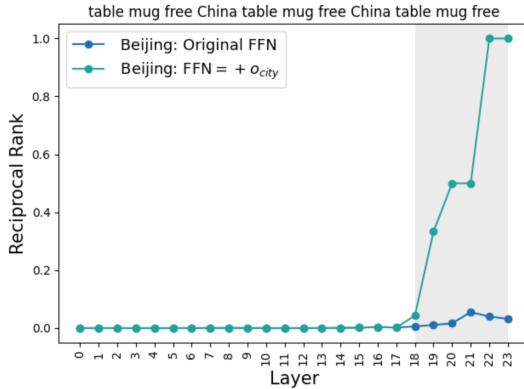

177 Figure 4: The gray area indicates layers where FFN  
 178 intervention was performed. We find that even if  
 179 the input context is nonsense (repeating pattern of  
 180 “table mug free China”), if we can use “China” as  
 181 an argument in the residual stream, the  $o_{city}^{\vec{r}}$  vector  
 182 has the effect of promoting the correct capital city.  
 183  
 184  
 185 layers with these vectors and run new inputs through the intervened model.<sup>5</sup>

We test whether these updates have the same  
 effect, and thus implement the same function, as  
 they do in the original contexts from which they  
 were extracted, which would imply a systematic  
 structure in the internal embedding space the  
 LM leverages. To do so, we replace entire FFN  
 layers with these vectors and run new inputs through the intervened model.<sup>5</sup>

<sup>4</sup>In Appendix A we extend these results to GPT-J, for which the same procedure leads to strong effects on uppercasing, but smaller overall positive effects on capital cities and past tenses (see Section 7).

<sup>5</sup>Which FFNs to replace is a hyperparameter; we find that replacing layers 18-23 in GPT2-Medium leads to good results. It also appears necessary to replace multiple FFNs at a time. See additional experiments in Appendix D. In summary, it is likely that the  $\vec{o}$  vectors are added over the course of several layers, consistent

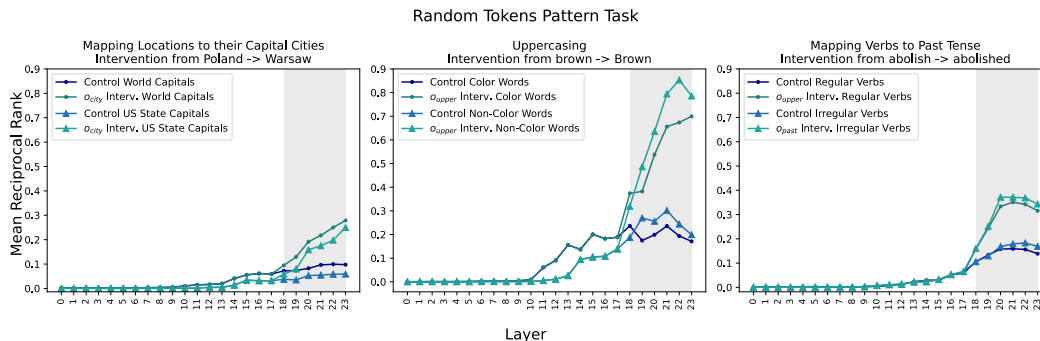

Figure 5: We intervene on GPT2-Medium’s forward pass while it is predicting the completion of a pattern. The control indicates normal model execution, while the gray boxes indicate which FFNs are replaced with our selected  $\vec{o}$  vectors. We can see a significant increase in the reciprocal rank of the output of the function implemented by the  $\vec{o}$  vector used even though the context is completely absent of any indication of the original task.

186 **Data:** We are interested in whether the captured  $\vec{o}$  vectors can be applied in a novel context,  
 187 in particular, to a context that is otherwise devoid of cues as to the function of interest. Thus,  
 188 we synthesize a new dataset where each entry is a string of three random tokens (with leading  
 189 spaces) followed by a token  $x$  which represents a potential argument to the function of interest.  
 190 For example, in experiments involving  $\vec{o}_{city}$ , we might include a sequence such as `table mug`  
 191 `free China table mug free China table mug free`. This input primes the model  
 192 to produce “China” at the top of the residual stream, but provides no cues that the capital city is  
 193 relevant, and thus allows us to isolate the effect of  $\vec{o}_{city}$  in promoting “Beijing” in the residual stream.  
 194 In addition to the original categories, we also include an “out-of-domain” dataset for each task: US  
 195 states and capitals, 100 non-color words, and 128 irregular verbs. These additional data test the  
 196 sensitivity of the  $\vec{o}$  vectors to different types of arguments.

197 **Results:** Figure 4 shows results for a single example. Here, we see that “Beijing” is promoted all the  
 198 way to the top of the distribution solely due to the injection of  $\vec{o}_{city}$  into the forward pass. Figure  
 199 5 shows that this pattern holds in aggregate. In all settings, we see that the outputs of the intended  
 200 functions are strongly promoted by adding the corresponding  $\vec{o}$  vectors. By the last layer, for world  
 201 and state capitals, the mean reciprocal rank of the target city name across all examples improves from  
 202 roughly the 10th to the 4th-highest ranked word and 20th and 3rd-ranked words respectively.

203 We also see the promotion of the proper past tense verbs by  $\vec{o}_{past}$ . The reciprocal ranks improve  
 204 similarly for both regular (approx. 7th to 3rd rank) and irregular verbs (approx. 6th to 3rd), indicating  
 205 that the relationship between tenses is encoded similarly by the model for these two types.  $\vec{o}_{upper}$   
 206 promotes the capitalized version of the test token almost every time, although the target word starts at  
 207 a higher rank (on average, rank 5). These results together show that regardless of the surrounding  
 208 context, and regardless of the argument to which it is applied,  $\vec{o}$  vectors consistently apply the  
 209 expected functions. Since each vector was originally extracted from the model’s processing of  
 210 a single naturalistic input, this generalizability suggests **significant structure and cross-context**  
 211 **abstraction within the learned embedding-space.**

212 **Common Errors:** While the above trend clearly holds on the aggregate, the intervention is not  
 213 perfect for individual cases. The most common error is that the intervention has no real effect. In  
 214 the in-domain (out-domain) settings, this occurred in about 37% (20%) of capital cities, 4% (5%)  
 215 on uppercasing, and 19% (22%) for past tensing. We believe the rate is so much higher for world  
 216 capitals because the model did not have a strong association between certain country-capital pairs  
 217 from pretraining, e.g, for less frequently mentioned countries. Typically, in these cases, the top token  
 218 remains the argument, but sometimes becomes some random other city, for example, predicting the  
 219 capital of Armenia is Vienna. We also find that the way tokenization splits the argument and target

with the idea that residual connections encourage each layer to move gradually towards a point of lower loss (Jastrzebski et al., 2017).

220 words affects the ability of the  $\vec{o}$  vector to work and is another source of errors. This is discussed  
 221 further in Appendix E.

## 222 5 The Role of FFNs in Out-of-Context Retrieval

223 So far, we have shown that FFN output vectors can encode functions that transfer across contexts.  
 224 Here we investigate whether the mechanism we identify applies in general to associations of this  
 225 type, or rather if such functionality can be implemented by the attention mechanism instead. Shared  
 226 among the tasks we study is the requirement to recall a token that does not appear in the given context  
 227 (abstractive tasks). In this section we show that mid-higher layer FFNs are crucial for this process.  
 228 When the answer to the question *does* appear in context (extractive tasks), we find that ablating a  
 229 subset of FFNs has a comparatively minor effect on performance, indicating that they are relatively  
 230 modular and there is a learned division of labor within the model. This observation holds across the  
 231 decoder-only LMs tested in this paper, but is particularly salient in the larger/deeper networks. This  
 232 breakdown is consistent with previous work finding that FFNs store facts learned from pre-training  
 233 [Geva et al., 2021a, Meng et al., 2022b,c] and attention heads copy from the previous context [Wang  
 234 et al., Olsson et al., 2022].

### 235 5.1 Abstractive vs. Extractive Tasks

236 **Extractive Tasks:** Extractive tasks are those in which the exact tokens required to answer a prompt  
 237 can be found in the input context. These tasks can thus be solved by parsing the local context alone,  
 238 and thus do not necessarily require the model to apply a function of the type we have focused on in  
 239 this paper (e.g., a function like `get_capital`).

240 **Abstractive Tasks:** Are those in which the answer to a prompt is not given in the input context  
 241 and must be retrieved from pretraining memory. Our results suggest this is done primarily through  
 242 argument-function processing, requiring function application through (typically) FFN updates as  
 243 described in Section B.

244 We provide examples with their associated GPT2-Medium layerwise decodings in Figure 6. We  
 245 expect that the argument formation and function application stages of processing occur primarily in  
 246 abstractive tasks. Indeed, in Appendix A, we show that the characteristic argument-answer X pattern  
 247 disappears on extractive inputs. We hypothesize that applying out-of-context transformations to the  
 248 predicted token representation is one of the primary functions of FFNs in the mid-to-late layers, and  
 249 that removing them should only have a major effect on tasks that require out-of-context retrieval.  
 250

| Top Tokens per Layer |                                       |                                         |
|----------------------|---------------------------------------|-----------------------------------------|
|                      | Abstractive Task                      | Extractive Task                         |
| 251                  |                                       | The capital of<br>Somalia is Mogadishu. |
| 252                  | Q: What is the capital<br>of Somalia? | The capital of Poland<br>is Warsaw.     |
| 253                  | A: Mogadishu                          | Q: What is the capital<br>of Somalia?   |
| 254                  | Q: What is the capital<br>of Poland?  | A: Mogadishu                            |
| 255                  | A:                                    | Q: What is the capital<br>of Poland?    |
| 256                  |                                       | A:                                      |
| 257                  | ...                                   | ...                                     |
| 258                  | 14 St                                 | St                                      |
| 259                  | 15 Poland                             | St                                      |
| 260                  | 16 Poland                             | Warsaw                                  |
| 261                  | 17 Poland                             | Warsaw                                  |
| 262                  | 18 Poland                             | Warsaw                                  |
| 263                  | 19 Warsaw                             | Warsaw                                  |
| 264                  | 20 Warsaw                             | Warsaw                                  |
| 265                  | 21 Warsaw                             | Warsaw                                  |
| 266                  | 22 Warsaw                             | Warsaw                                  |
| 267                  | 23 Warsaw                             | Warsaw                                  |

266 Figure 6: The abstractive task undergoes arg-  
 267 argument formation (blue) and function appli-  
 268 cation (red), while the extractive task imme-  
 269 diately saturates (yellow).

### 5.2 Effect of Ablating FFNs

**Data:** Consider the example shown in Section 2.2 demonstrating the  $o_{upper}$  function. By providing the answer to the in-context example as “Silver”, we make the task abstractive by requiring the in-context token “brown” to be transformed to “Brown” in the test example. However, if we provide the in-context label as “silver”, the task becomes extractive, as the expected answer becomes “brown”. We create an extractive version of this dataset by lowercasing the example answer. All data is presented to the model with a single example (one-shot). Notice that the abstractive and extractive examples only differ by a single character and are thus minimally different.

We repeat this experiment on the world capitals task by adding the prefix “The capital of A is B. The capital of C is D” to each input. Notice, however, that since the answer is provided explicitly, the task is much easier for the models in the extractive case.

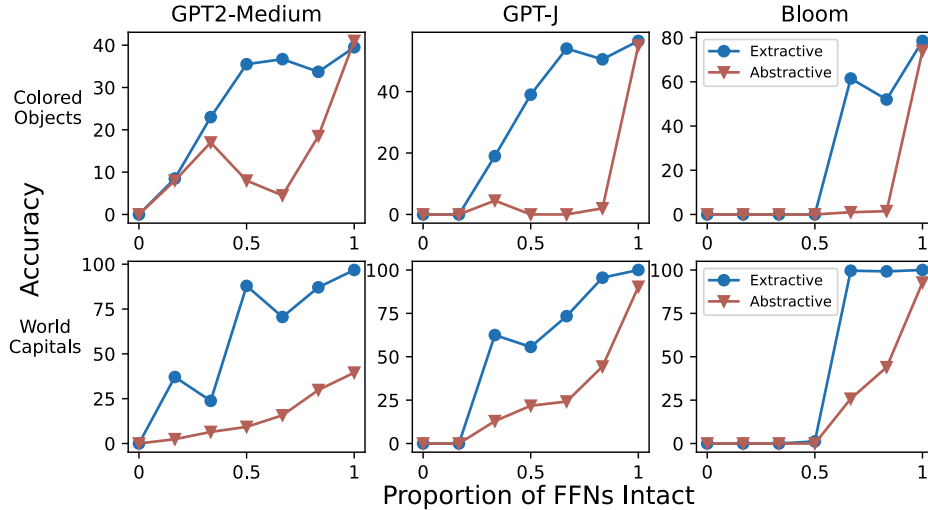

Figure 7: Removing FFNs negatively affects performance when the task is abstractive: the in-context label is an out-of-context transformation of the in-context prompt (e.g., “silver” in context, answer given as “Silver”). In comparison, on the extractive dataset, performance is robust to a large proportion of FFNs being removed. Other models tested are shown in Appendix B

270 **Procedure:** We run the one-shot extractive and abstractive datasets on the full models, and then  
 271 repeatedly remove an additional 1/6th of all FFNs from the top down (e.g., in 24 layer GPT2-Medium:  
 272 removing the 20-24th FFNs, then the 15-24th, etc.).

273 **Results:** Our results are shown in Figure 7. Despite the fact that the inputs in the abstractive  
 274 and extractive datasets only slightly differ (by a single character in the colored objects case) we  
 275 find that performance plummets on the abstractive task as FFNs are ablated, while accuracy on the  
 276 extractive task drops much more slowly. For example, even after 24 FFN sublayers are removed from  
 277 Bloom (totaling 39B parameters) extractive task accuracy for the colored objects dataset drops 17%  
 278 from the full model’s performance, while abstractive accuracy drops 73% (down to 1% accuracy).  
 279 The case is similar across model sizes and pretraining corpora; we include results on additional  
 280 models in Appendix B. This indicates that we can isolate the effect of locating and retrieving out of  
 281 context tokens in this setting to the FFNs. Additionally, because the model retains reasonably strong  
 282 performance compared to using the full model, we do not find convincing evidence that the later layer  
 283 FFNs are contributing to the extractive task performance, supporting the idea of modularity within  
 284 the network.

## 285 6 Related Work

286 Recent work has contributed to understanding language models by studying the role of different  
 287 modules in the transformer architecture in language modeling. In particular, the attention layers  
 288 [Olsson et al., 2022, Kobayashi et al., 2020, Wang et al.] and more notably for this work, the FFN  
 289 modules, which are frequently associated with factual recall and knowledge storage [Geva et al.,  
 290 2021a, Meng et al., 2022a,c]. Although how language models store and use knowledge has been  
 291 studied more generally as well [Petroni et al., 2019, Cao et al., 2021, Dai et al., 2022, Bouraoui et al.,  
 292 2019, Burns et al., 2022, Dalvi et al., 2022, Da et al., 2021] as well as in static embeddings [Dufter  
 293 et al., 2021]. Recent work in mechanistic interpretability aims to fully reverse engineer how LMs  
 294 perform some behaviors. Our work builds on the finding that FFN layers promote concepts in the  
 295 vocabulary space [Geva et al., 2022a] by breaking down the process the model uses to do this in  
 296 context. [Bansal et al., 2022] perform ablation studies to test the importance of attention and FFN  
 297 layers on in-context learning tasks, here we offer an explanation for their role in some cases. Other  
 298 work analyze information flow within an LM to study how representations are built through the layers  
 299 [Voita et al., 2019, Tenney et al., 2019] and show distinct points of processing in the model. We also  
 300 follow this approach, but our analysis focuses on interpreting how models use individual updates



301 within the forward pass, rather than probing for what information is encoded and potentially used to  
302 make predictions. [Ilharco et al., 2023] show that vector arithmetic can be performed with the weights  
303 of finetuned models to compose tasks, similar to how  $\vec{o}$  vectors can induce functions in the activation  
304 space of the model.

## 305 7 Discussion

306 In this work, we describe a mechanism that is partially responsible for LMs ability to recall  
307 factual associations. We conceptualize these recalls as the application of some function (e.g.,  
308 `get_capital(x) = y` and find that the next-token prediction goes through several discrete  
309 stages of processing in which the prediction first represents the argument  $x$  (e.g., Poland) before  
310 applying that function with an additive update to get the final answer  $y$  (Warsaw). A core challenge  
311 in interpreting neural networks is determining whether the information attributed to certain model  
312 components is actually used for that purpose during inference [Hase and Bansal, 2022, Leavitt and  
313 Morcos, 2020]. While previous work has implicated FFNs in recalling factual associations [Geva  
314 et al., 2022a, Meng et al., 2022a], we show through intervention experiments that we can manipulate  
315 the information flowing through the model during these stages. Specifically, we show that it is  
316 possible to capture the output vector of an FFN from a single forward pass on a single in-context  
317 learning example, and that the captured vector can be used to apply the same function to new argu-  
318 ments (e.g., other countries) in totally different contexts. This process provides a surprisingly simple  
319 explanation for the internal subprocesses used by LMs to recall factual associations and resembles  
320 vector arithmetic observed in static word embeddings. Our findings invite future work aimed at  
321 understanding why, and under what conditions, LMs learn to use this mechanism when they are  
322 capable of solving such tasks using, e.g., adhoc memorization.

323 A limitation that we observe is that the process for carrying out the  $\vec{o}$  intervention depends on  
324 hyperparameters which are often model-specific (i.e., the exact stimuli used to extract the intervention,  
325 and the layer(s) at which to perform the intervention). We provide our most detailed investigation on  
326 GPT2-Medium, which clearly illustrates the phenomenon. Our experiments on stages of processing  
327 with GPT-J suggest that the same phenomena is in play, although (as discussed in Section 4 and  
328 Appendix A), the procedures we derive for interventions on GPT2-Medium do not transfer perfectly.  
329 Specifically, we can strongly reproduce the intervention results on upercasing for GPT-J; results on  
330 the other two tasks are positive but with overall weaker effects. This requirement of model-specific  
331 customization is common in similar mechanistic interpretability work, e.g., [Meng et al., 2022a, Wang  
332 et al., 2022, Geva et al., 2022b], and a priority in future work must be to identify common patterns  
333 across these individual studies which reduce the need to repeat such effort on each new model. That  
334 said, in this work and other similar efforts, a single positive example as a proof of concept is often  
335 sufficient to advance understanding and spur future work that improves robustness across models.

336 In the long term, findings like those presented here have implications for improving the trustworthiness  
337 of LMs in production. If we can understand how models break down complex problems into simple  
338 and predictable subprocesses, we can help more readily audit their behavior. Interpreting the  
339 processing signatures of model behaviors might offer an avenue via which to audit and intervene  
340 at runtime in order to prevent unwanted behavior. Moreover, understanding which relations FFNs  
341 encode could aid work in fact location and editing. Contemporaneous work [Geva et al., 2023]  
342 has studied a different mechanism for factual recall in LMs, but it is unclear how and when these  
343 mechanisms interact.

## 344 8 Conclusion

345 We contribute to a growing body of work on interpreting how the internal processes of language  
346 models (LMs) produce some behavior. On three in-context learning tasks, we observe that the next-  
347 token prediction appears to undergo several stages of processing in which LMs represent arguments  
348 to functions in their residual streams. This process occurs in models ranging in size from 124M to  
349 176B parameters. On GPT2, We study instances where the additive update is made by the output  
350 vectors ( $\vec{o}$  vectors) of feed-forward networks (FFNs). We show that for all tasks we test,  $\vec{o}$  vectors  
351 calculated by the model in the process of solving some task can be extracted and replace the FFN  
352 updates of the model to solve novel instances of that task, providing evidence that LMs can learn  
353 *self-contained* and context-independent functions from pretraining.

354 **References**

- 355 Hritik Bansal, Karthik Gopalakrishnan, Saket Dingliwal, Sravan Bodapati, Katrin Kirchhoff, and  
356 Dan Roth. Rethinking the Role of Scale for In-Context Learning: An Interpretability-based Case  
357 Study at 66 Billion Scale, December 2022. URL <http://arxiv.org/abs/2212.09095>,  
358 arXiv:2212.09095 [cs].
- 359 Zied Bouraoui, Jose Camacho-Collados, and Steven Schockaert. Inducing Relational Knowledge  
360 from BERT, November 2019. URL <https://arxiv.org/abs/1911.12753v1>
- 361 Collin Burns, Haotian Ye, Dan Klein, and Jacob Steinhardt. Discovering Latent Knowledge in  
362 Language Models Without Supervision, December 2022. URL [http://arxiv.org/abs/](http://arxiv.org/abs/2212.03827)  
363 [2212.03827](http://arxiv.org/abs/2212.03827) arXiv:2212.03827 [cs].
- 364 Boxi Cao, Hongyu Lin, Xianpei Han, Le Sun, Lingyong Yan, Meng Liao, Tong Xue, and Jin  
365 Xu. Knowledgeable or Educated Guess? Revisiting Language Models as Knowledge Bases. In  
366 *Proceedings of the 59th Annual Meeting of the Association for Computational Linguistics and the*  
367 *11th International Joint Conference on Natural Language Processing (Volume 1: Long Papers)*,  
368 pages 1860–1874, Online, August 2021. Association for Computational Linguistics. doi: 10.18653/  
369 v1/2021.acl-long.146. URL <https://aclanthology.org/2021.acl-long.146>.
- 370 Jeff Da, Ronan Le Bras, Ximing Lu, Yejin Choi, and Antoine Bosselut. Analyzing Commonsense  
371 Emergence in Few-shot Knowledge Models. September 2021. URL [https://openreview](https://openreview.net/forum?id=StHCElh9PVE)  
372 [.net/forum?id=StHCElh9PVE](https://openreview.net/forum?id=StHCElh9PVE).
- 373 Damai Dai, Li Dong, Yaru Hao, Zhifang Sui, Baobao Chang, and Furu Wei. Knowledge neurons  
374 in pretrained transformers. In *Proceedings of the 60th Annual Meeting of the Association for*  
375 *Computational Linguistics (Volume 1: Long Papers)*, pages 8493–8502, 2022.
- 376 Fahim Dalvi, Abdul Rafae Khan, Firoj Alam, Nadir Durrani, Jia Xu, and Hassan Sajjad. Discover-  
377 ing Latent Concepts Learned in BERT, May 2022. URL [http://arxiv.org/abs/2205.](http://arxiv.org/abs/2205.07237)  
378 [07237](http://arxiv.org/abs/2205.07237), arXiv:2205.07237 [cs].
- 379 Jacob Devlin, Ming-Wei Chang, Kenton Lee, and Kristina Toutanova. BERT: Pre-training of deep  
380 bidirectional transformers for language understanding. In *Proceedings of the 2019 Conference of*  
381 *the North American Chapter of the Association for Computational Linguistics: Human Language*  
382 *Technologies, Volume 1 (Long and Short Papers)*, pages 4171–4186, Minneapolis, Minnesota, June  
383 2019. Association for Computational Linguistics. doi: 10.18653/v1/N19-1423. URL [https:](https://aclanthology.org/N19-1423)  
384 [//aclanthology.org/N19-1423](https://aclanthology.org/N19-1423).
- 385 Philipp Dufter, Nora Kassner, and Hinrich Schütze. Static Embeddings as Efficient Knowledge  
386 Bases? In *Proceedings of the 2021 Conference of the North American Chapter of the Association*  
387 *for Computational Linguistics: Human Language Technologies*, pages 2353–2363, Online, June  
388 2021. Association for Computational Linguistics. doi: 10.18653/v1/2021.naacl-main.186. URL  
389 <https://aclanthology.org/2021.naacl-main.186>.
- 390 N Elhage, N Nanda, C Olsson, T Henighan, N Joseph, B Mann, A Askell, Y Bai, A Chen, T Conerly,  
391 et al. A mathematical framework for transformer circuits. *Transformer Circuits Thread*, 2021.
- 392 Mor Geva, Roei Schuster, Jonathan Berant, and Omer Levy. Transformer feed-forward layers are  
393 key-value memories. In *Proceedings of the 2021 Conference on Empirical Methods in Natural*  
394 *Language Processing*, pages 5484–5495, 2021a.
- 395 Mor Geva, Roei Schuster, Jonathan Berant, and Omer Levy. Transformer Feed-Forward Layers Are  
396 Key-Value Memories. In *Proceedings of the 2021 Conference on Empirical Methods in Natural*  
397 *Language Processing*, pages 5484–5495, Online and Punta Cana, Dominican Republic, November  
398 2021b. Association for Computational Linguistics. doi: 10.18653/v1/2021.emnlp-main.446. URL  
399 <https://aclanthology.org/2021.emnlp-main.446>.
- 400 Mor Geva, Avi Caciularu, Kevin Ro Wang, and Yoav Goldberg. Transformer feed-forward layers  
401 build predictions by promoting concepts in the vocabulary space. *arXiv preprint arXiv:2203.14680*,  
402 2022a.

- 403 Mor Geva, Avi Caciularu, Kevin Ro Wang, and Yoav Goldberg. Transformer Feed-Forward Layers  
404 Build Predictions by Promoting Concepts in the Vocabulary Space, October 2022b. URL <http://arxiv.org/abs/2203.14680>. arXiv:2203.14680 [cs].  
405
- 406 Mor Geva, Jasmijn Bastings, Katja Filippova, and Amir Globerson. Dissecting recall of factual  
407 associations in auto-regressive language models, 2023.
- 408 Peter Hase and Mohit Bansal. When can models learn from explanations? a formal framework for  
409 understanding the roles of explanation data. In *Proceedings of the First Workshop on Learning  
410 with Natural Language Supervision*, pages 29–39, Dublin, Ireland, May 2022. Association for  
411 Computational Linguistics. doi: 10.18653/v1/2022.inls-1.4. URL <https://aclanthology.org/2022.inls-1.4>.  
412
- 413 Gabriel Ilharco, Marco Tulio Ribeiro, Mitchell Wortsman, Suchin Gururangan, Ludwig Schmidt,  
414 Hannaneh Hajishirzi, and Ali Farhadi. Editing models with task arithmetic. *ICLR*, 2023.
- 415 Stanisław Jastrzebski, Devansh Arpit, Nicolas Ballas, Vikas Verma, Tong Che, and Yoshua Bengio.  
416 Residual connections encourage iterative inference. In *International Conference on Learning  
417 Representations*, 2017.
- 418 Goro Kobayashi, Tatsuki Kuribayashi, Sho Yokoi, and Kentaro Inui. Attention is not only a weight:  
419 Analyzing transformers with vector norms. In *Proceedings of the 2020 Conference on Empirical  
420 Methods in Natural Language Processing (EMNLP)*, pages 7057–7075, Online, November 2020.  
421 Association for Computational Linguistics. doi: 10.18653/v1/2020.emnlp-main.574. URL <https://aclanthology.org/2020.emnlp-main.574>.  
422
- 423 Matthew L Leavitt and Ari Morcos. Towards falsifiable interpretability research. *arXiv preprint  
424 arXiv:2010.12016*, 2020.
- 425 Kenneth Li, Aspen K Hopkins, David Bau, Fernanda Viégas, Hanspeter Pfister, and Martin Watten-  
426 berg. Emergent world representations: Exploring a sequence model trained on a synthetic task.  
427 *arXiv preprint arXiv:2210.13382*, 2022.
- 428 Kevin Meng, David Bau, Alex Andonian, and Yonatan Belinkov. Locating and Editing Fac-  
429 tual Associations in GPT, October 2022a. URL <http://arxiv.org/abs/2202.05262>.  
430 arXiv:2202.05262 [cs] version: 4.
- 431 Kevin Meng, David Bau, Alex J Andonian, and Yonatan Belinkov. Locating and editing factual  
432 associations in gpt. In *Advances in Neural Information Processing Systems*, 2022b.
- 433 Kevin Meng, Arnab Sen Sharma, Alex Andonian, Yonatan Belinkov, and David Bau. Mass editing  
434 memory in a transformer. *arXiv preprint arXiv:2210.07229*, 2022c.
- 435 Tomas Mikolov, Kai Chen, Greg Corrado, and Jeffrey Dean. Efficient estimation of word representa-  
436 tions in vector space. *arXiv preprint arXiv:1301.3781*, 2013.
- 437 nostalgebraist. interpreting GPT: the logit lens. 2020. URL [https://www.lesswrong.com/  
438 posts/AcKRB8wDpdaN6v6ru/interpreting-gpt-the-logit-lens](https://www.lesswrong.com/posts/AcKRB8wDpdaN6v6ru/interpreting-gpt-the-logit-lens).
- 439 Catherine Olsson, Nelson Elhage, Neel Nanda, Nicholas Joseph, Nova DasSarma, Tom Henighan,  
440 Ben Mann, Amanda Askell, Yuntao Bai, Anna Chen, Tom Conerly, Dawn Drain, Deep Ganguli,  
441 Zac Hatfield-Dodds, Danny Hernandez, Scott Johnston, Andy Jones, Jackson Kernion, Liane  
442 Lovitt, Kamal Ndousse, Dario Amodei, Tom Brown, Jack Clark, Jared Kaplan, Sam McCandlish,  
443 and Chris Olah. In-context learning and induction heads. *Transformer Circuits Thread*, 2022.  
444 <https://transformer-circuits.pub/2022/in-context-learning-and-induction-heads/index.html>.
- 445 Matthew E. Peters, Mark Neumann, Mohit Iyyer, Matt Gardner, Christopher Clark, Kenton Lee, and  
446 Luke Zettlemoyer. Deep contextualized word representations. In *Proceedings of the 2018 Confer-  
447 ence of the North American Chapter of the Association for Computational Linguistics: Human  
448 Language Technologies, Volume 1 (Long Papers)*, pages 2227–2237, New Orleans, Louisiana,  
449 June 2018. Association for Computational Linguistics. doi: 10.18653/v1/N18-1202. URL  
450 <https://aclanthology.org/N18-1202>.

- 451 Fabio Petroni, Tim Rocktäschel, Sebastian Riedel, Patrick Lewis, Anton Bakhtin, Yuxiang Wu,  
452 and Alexander Miller. Language Models as Knowledge Bases? In *Proceedings of the 2019*  
453 *Conference on Empirical Methods in Natural Language Processing and the 9th International Joint*  
454 *Conference on Natural Language Processing (EMNLP-IJCNLP)*, pages 2463–2473, Hong Kong,  
455 China, November 2019. Association for Computational Linguistics. doi: 10.18653/v1/D19-1250.  
456 URL <https://aclanthology.org/D19-1250>.
- 457 Alec Radford, Jeffrey Wu, Rewon Child, David Luan, Dario Amodei, Ilya Sutskever, et al. Language  
458 models are unsupervised multitask learners.
- 459 Teven Le Scao, Angela Fan, Christopher Akiki, Ellie Pavlick, Suzana Ilić, Daniel Hesslow, Roman  
460 Castagné, Alexandra Sasha Luccioni, François Yvon, Matthias Gallé, et al. Bloom: A 176b-  
461 parameter open-access multilingual language model. *arXiv preprint arXiv:2211.05100*, 2022.
- 462 Aarohi Srivastava, Abhinav Rastogi, Abhishek Rao, Abu Awal Md Shoeb, Abubakar Abid, Adam  
463 Fisch, Adam R Brown, Adam Santoro, Aditya Gupta, Adrià Garriga-Alonso, et al. Beyond the  
464 imitation game: Quantifying and extrapolating the capabilities of language models. *arXiv preprint*  
465 *arXiv:2206.04615*, 2022.
- 466 Ian Tenney, Dipanjan Das, and Ellie Pavlick. Bert rediscovers the classical nlp pipeline. In *Pro-*  
467 *ceedings of the 57th Annual Meeting of the Association for Computational Linguistics*, pages  
468 4593–4601, 2019.
- 469 Ashish Vaswani, Noam Shazeer, Niki Parmar, Jakob Uszkoreit, Llion Jones, Aidan N Gomez, Łukasz  
470 Kaiser, and Illia Polosukhin. Attention is all you need. *Advances in neural information processing*  
471 *systems*, 30, 2017.
- 472 Elena Voita, Rico Sennrich, and Ivan Titov. The Bottom-up Evolution of Representations in the  
473 Transformer: A Study with Machine Translation and Language Modeling Objectives. In *Pro-*  
474 *ceedings of the 2019 Conference on Empirical Methods in Natural Language Processing and the*  
475 *9th International Joint Conference on Natural Language Processing (EMNLP-IJCNLP)*, pages  
476 4396–4406, Hong Kong, China, November 2019. Association for Computational Linguistics. doi:  
477 10.18653/v1/D19-1448. URL <https://aclanthology.org/D19-1448>.
- 478 Ben Wang and Aran Komatsuzaki. GPT-J-6B: A 6 Billion Parameter Autoregressive Language Model.  
479 <https://github.com/kingoflolz/mesh-transformer-jax>, May 2021.
- 480 Kevin Wang, Alexandre Variengien, Arthur Conmy, Buck Shlegeris, and Jacob Steinhardt. Inter-  
481 pretability in the Wild: a Circuit for Indirect Object Identification in GPT-2 small, November 2022.  
482 *arXiv:2211.00593* [cs].
- 483 Kevin Ro Wang, Alexandre Variengien, Arthur Conmy, Buck Shlegeris, and Jacob Steinhardt.  
484 Interpretability in the wild: a circuit for indirect object identification in gpt-2 small. In *NeurIPS*  
485 *ML Safety Workshop*.
